# Supplementary material for: Eleven key measures for monitoring general practice clinical activity during COVID-19: A retrospective cohort study using 48 million adults’ primary care records in England through OpenSAFELY
Source: eLife journal article supplement (doi:10.7554/elife.84673), 2023-07-07
Supplement: supp1 [file elife-84673-supp1-v1.pdf]

**Supplementary Table 1. Counts of the five most commonly used codes within each measure codelist between January 2019 and April 2021.**

| <b>Measure</b>                                 | <b>Code</b>      | <b>SNOMED-CT Top Level Hierarchy</b> | <b>Description</b>                                          | <b>Proportion of codes, TPP (%)</b> | <b>Proportion of codes, EMIS (%)</b> | <b>Total Proportion of codes (%)</b> |
|------------------------------------------------|------------------|--------------------------------------|-------------------------------------------------------------|-------------------------------------|--------------------------------------|--------------------------------------|
| Blood pressure monitoring                      | 72313002         | Observable entity                    | Systolic arterial pressure                                  | 95.6                                | 96.7                                 | 96.2                                 |
|                                                | 413606001        | Observable entity                    | Average home systolic blood pressure                        | 2.9                                 | 2.3                                  | 2.5                                  |
|                                                | 407554009        | Observable entity                    | Sitting systolic blood pressure                             | 0.5                                 | 0.3                                  | 0.4                                  |
|                                                | 400974009        | Observable entity                    | Standing systolic blood pressure                            | 0.5                                 | 0.3                                  | 0.3                                  |
|                                                | 314445006        | Observable entity                    | Average night interval systolic blood pressure              | 0.1                                 | -                                    | 0.1                                  |
|                                                | 314449000        | Observable entity                    | Average 24 hour systolic blood pressure                     | -                                   | 0.2                                  | -                                    |
| Cardiovascular Disease 10 Year Risk Assessment | 718087004        | Observable entity                    | QRISK2 cardiovascular disease 10 year risk score            | 98.9                                | 95.1                                 | 96.5                                 |
|                                                | 763244005        | Observable entity                    | QRISK cardiovascular disease 10 year risk calculator score  | 0.8                                 | 3.7                                  | 2.6                                  |
|                                                | 1085871000000105 | Observable entity                    | QRISK3 cardiovascular disease 10 year risk calculator score | 0.3                                 | 0.9                                  | 0.6                                  |
|                                                | 809311000000105  | Procedure                            | Cardiovascular disease risk assessment by third party       | <0.1                                | 0.3                                  | 0.2                                  |
|                                                | 752451000000100  | Observable entity                    | Framingham coronary heart disease 10 year risk score        | -                                   | 0.1                                  | 0.1                                  |

|                                                         |                  |                   |                                                   |      |      |      |
|---------------------------------------------------------|------------------|-------------------|---------------------------------------------------|------|------|------|
|                                                         | 752451000000100  | Observable entity | Joint British Societies cardiovascular risk score | <0.1 | -    | -    |
| Cholesterol Testing                                     | 1005671000000105 | Observable entity | Serum cholesterol level                           | 99.1 | 96.9 | 97.9 |
|                                                         | 1017161000000104 | Observable entity | Plasma total cholesterol level                    | 0.8  | 3.1  | 2.0  |
|                                                         | 850981000000101  | Observable entity | Cholesterol level                                 | 0.2  | <0.1 | 0.1  |
|                                                         | 853681000000104  | Observable entity | Total cholesterol level                           | -    | <0.1 | <0.1 |
|                                                         | 365794002        | Finding           | Finding of serum cholesterol level                | -    | <0.1 | <0.1 |
|                                                         | 395153009        | Procedure         | Pre-treatment serum cholesterol level             | <0.1 | -    | -    |
| Liver Function Testing - Alanine aminotransferase (ALT) | 1018251000000107 | Observable entity | Serum alanine aminotransferase level              | 96.4 | 95.6 | 96.0 |
|                                                         | 1013211000000103 | Observable entity | Plasma alanine aminotransferase level             | 3.5  | 4.2  | 3.8  |
|                                                         | 250637003        | Procedure         | Alanine aminotransferase - blood measurement      | 0.1  | 0.3  | 0.2  |
|                                                         | 34608000         | Procedure         | Alanine aminotransferase measurement              | 0.1  | -    | <0.1 |
|                                                         | 201321000000108  | Procedure         | Serum alanine aminotransferase level              | -    | <0.1 | <0.1 |
|                                                         | 390961000        | Procedure         | Plasma alanine aminotransferase level             | -    | <0.1 | -    |
| Thyroid Testing (TSH)                                   | 1022791000000101 | Observable entity | Serum thyroid stimulating hormone level           | 97.6 | 97.1 | 97.3 |
|                                                         | 1022801000000102 | Observable entity | Plasma thyroid stimulating hormone level          | 2.3  | 2.7  | 2.5  |
|                                                         | 1027151000000105 | Observable entity | Thyroid stimulating hormone level                 | 0.1  | 0.2  | 0.2  |
|                                                         | 61167004         | Procedure         | Thyroid stimulating hormone measurement           | -    | <0.1 | <0.1 |

|                                                 |                  |                   |                                                                                     |       |       |       |
|-------------------------------------------------|------------------|-------------------|-------------------------------------------------------------------------------------|-------|-------|-------|
|                                                 | 313440008        | Procedure         | Measurement of serum thyroid stimulating hormone                                    | -     | <0.1  | <0.1  |
| Full Blood Count - Red Blood Cell (RBC) Testing | 1022451000000103 | Observable entity | Red blood cell count                                                                | 100.0 | >99.9 | >99.9 |
|                                                 | 365625004        | Finding           | Finding of red blood cell count                                                     | -     | <0.1  | <0.1  |
|                                                 | 14089001         | Procedure         | Red blood cell count                                                                | -     | <0.1  | <0.1  |
| Glycated Haemoglobin A1c Level (HbA1c)          | 999791000000106  | Observable entity | Haemoglobin A1c level - IFCC standardised                                           | 98.9  | 94.5  | 96.5  |
|                                                 | 1003671000000109 | Observable entity | Haemoglobin A1c level                                                               | 1.1   | 5.5   | 3.5   |
|                                                 | 43396009         | Procedure         | Hemoglobin A1c measurement                                                          | 0.1   | <0.1  | <0.1  |
|                                                 | 365845005        | Finding           | Hemoglobin A1C - diabetic control finding                                           | <0.1  | <0.1  | <0.1  |
|                                                 | 313835008        | Procedure         | Haemoglobin A1c measurement aligned to the Diabetes Control and Complications Trial | -     | <0.1  | <0.1  |
| Renal Function Assessment - Sodium Testing      | 1000661000000107 | Observable entity | Serum sodium level                                                                  | 97.8  | 96.8  | 97.2  |
|                                                 | 1017381000000106 | Observable entity | Plasma sodium level                                                                 | 2.2   | 3.2   | 2.8   |
| Asthma Reviews                                  | 394700004        | Procedure         | Asthma annual review                                                                | 63.6  | 60.8  | 62.1  |
|                                                 | 394720003        | Procedure         | Asthma medication review                                                            | 17.4  | 8.4   | 12.5  |
|                                                 | 401182001        | Procedure         | Asthma monitoring by nurse                                                          | 9.2   | 8.6   | 8.9   |
|                                                 | 270442000        | Finding           | Asthma monitoring check done                                                        | -     | 11.0  | 5.9   |
|                                                 | 401183006        | Procedure         | Asthma monitoring by doctor                                                         | -     | 5.1   | 2.7   |

|                                                      |                 |           |                                                        |      |      |      |
|------------------------------------------------------|-----------------|-----------|--------------------------------------------------------|------|------|------|
|                                                      | 394701000       | Procedure | Asthma follow-up                                       | 4.8  | -    | -    |
|                                                      | 390877003       | Procedure | Step up change in asthma management plan               | 2.6  | -    | -    |
| Chronic Obstructive Pulmonary Disease (COPD) Reviews | 394703002       | Procedure | Chronic obstructive pulmonary disease annual review    | 93.9 | 98.7 | 96.5 |
|                                                      | 760621000000103 | Procedure | Chronic obstructive pulmonary disease 6 monthly review | 3.5  | 0.9  | 2.1  |
|                                                      | 760601000000107 | Procedure | Chronic obstructive pulmonary disease 3 monthly review | 2.7  | 0.4  | 1.4  |
| Medication Review                                    | 314530002       | Situation | Medication review done                                 | 69.3 | 8.0  | 34.7 |
|                                                      | 182836005       | Procedure | Review of medication                                   | 3.0  | 42.7 | 25.4 |
|                                                      | 88551000000109  | Procedure | Medication review with patient                         | 2.9  | 19.6 | 12.3 |
|                                                      | 93311000000106  | Procedure | Medication review of medical notes                     | -    | 12.5 | 7.1  |
|                                                      | 394720003       | Procedure | Asthma medication review                               | 2.5  | 2.0  | 2.3  |
|                                                      | 719329004       | Situation | Medication review done by pharmacist                   | 3.1  | -    | -    |

"-": code outside the top five codes
